# Supplementary figures and images for: A study of the effect of organic solvents on the fluorescence signal in a sequential injection analysis system
Source: Royal Society of Chemistry journal article supplement (doi:10.1039/c4ay01977f), 2014-01-01

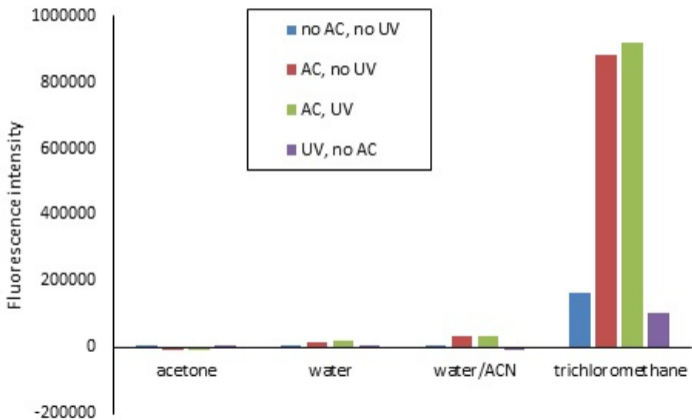

Supplement: c4ay01977f2.pdf [file c4ay01977f2.pdf]

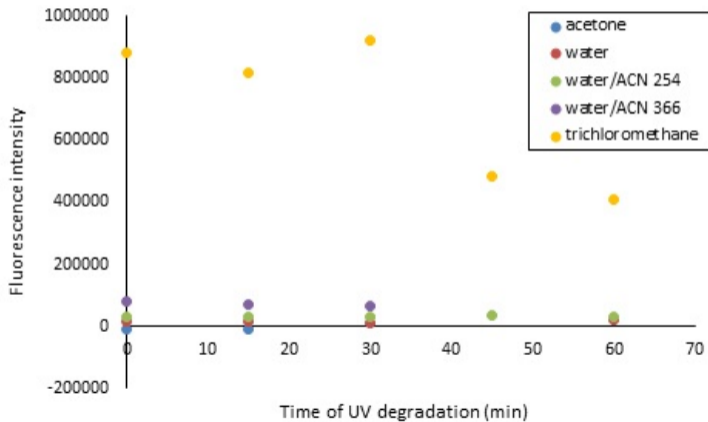

Supplement: c4ay01977f4.pdf [file c4ay01977f4.pdf]
